# Supplementary material for: Histidine-Triad Hydrolases Provide Resistance to Peptide-Nucleotide Antibiotics
Source: PubMed Central journal article supplement (PMC7157772; doi:10.1128/mbio.00497-20), 2020-04-07
Supplement: mBio.00497-20-sf001.pdf [file mBio.00497-20-sf001.pdf]

SUPPLEMENTARY MATERIALS

**Histidine-Triad Hydrolases Provide Resistance to Peptide-Nucleotide Antibiotics**

Eldar Yagmurov<sup>1</sup>, Darya Tsibulskaya<sup>1,2</sup>, Alexey Livenskiy<sup>2,3</sup>, Marina Serebryakova<sup>2,4</sup>, Yury I. Wolf<sup>5</sup>, Sergei Borukhov<sup>6</sup>, Konstantin Severinov<sup>1,7,8\*</sup>, and Svetlana Dubiley<sup>1,2\*</sup>

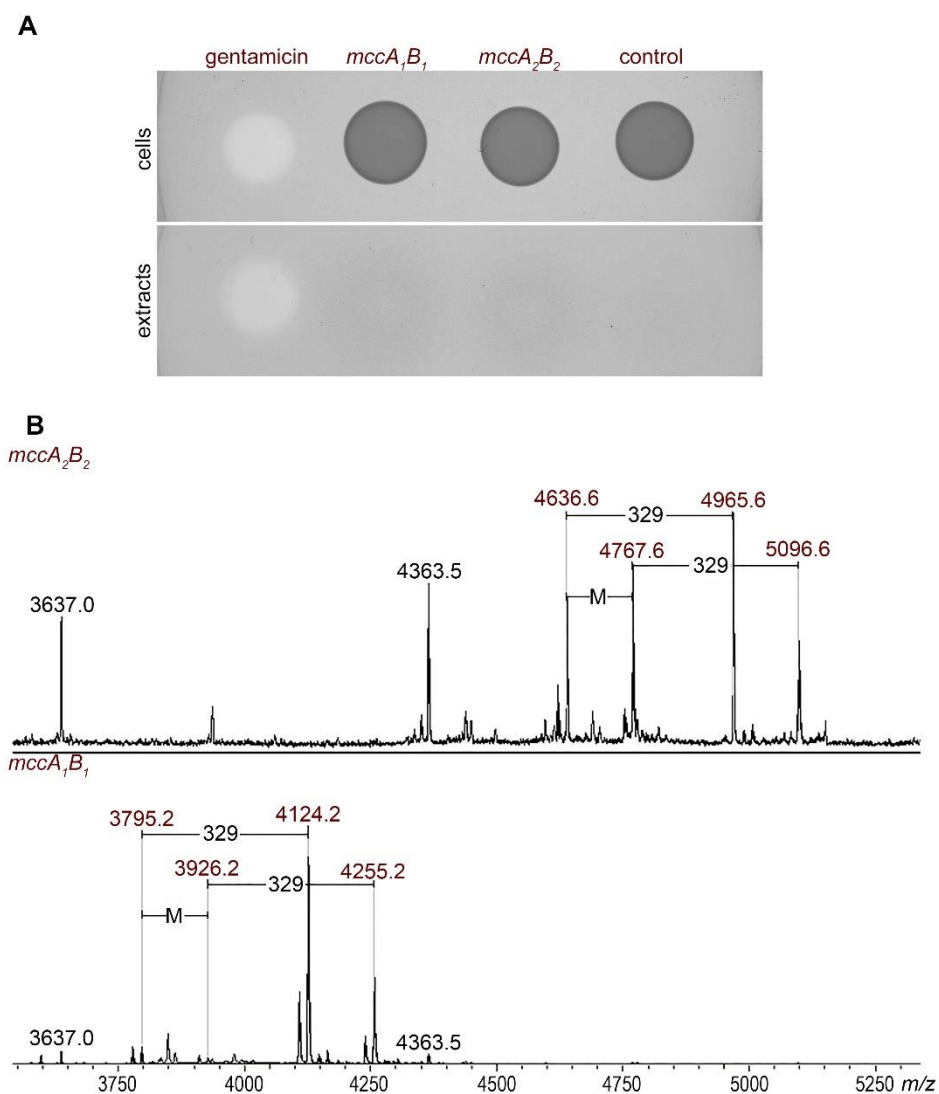

**Figure S1. Production of  $McC_1^{Hmi}$  and  $McC_2^{Hmi}$  in heterologous host.**

(A) *E. coli* cells harboring plasmid-borne *H. minutum* *mcc* operon do not produce toxic compounds: *mccA<sub>1</sub>B<sub>1</sub>* – *E. coli* BL21(DE3) cells harboring pRSF\_*mccA<sub>1</sub>B<sub>1</sub>*<sup>Hmi</sup> and pACYC\_*mccP<sub>1</sub>P<sub>2</sub>P<sub>3</sub>*<sup>Hmi</sup> plasmids, *mccA<sub>2</sub>B<sub>2</sub>* – BL21(DE3) cells carrying pRSF\_*mccA<sub>2</sub>B<sub>2</sub>*<sup>Hmi</sup> and

pACYC\_ *mccP*<sub>1</sub>*P*<sub>2</sub>*P*<sub>3</sub><sup>Hmi</sup> plasmids, control - *E. coli* BL21(DE3) cells harboring empty pRSF and pACYC vectors. Cells were induced for 24 h at 30 °C, then extracted as described in (37). 5 µl of 10-times concentrated cell cultures (upper panel) or cellular extractes (lower panel) were deposited on the surface of McC-sensitive *E. coli* B cells lawn (upper panel). 2 µl of 0.5 µg/mL gentamycin solution was used as a control antibiotic.

(B) MALDI-TOF-MS analysis of *E. coli* BL21 cells harboring pRSF\_ *mccA*<sub>2</sub>*B*<sub>2</sub><sup>Hmi</sup> and pACYC\_ *mccP*<sub>1</sub>*P*<sub>2</sub>*P*<sub>3</sub><sup>Hmi</sup> (upper panel) and pRSF\_ *mccA*<sub>1</sub>*B*<sub>1</sub><sup>Hmi</sup> and pACYC\_ *mccP*<sub>1</sub>*P*<sub>2</sub>*P*<sub>3</sub><sup>Hmi</sup> plasmids (lower panel). At the top spectrum, MH<sup>+</sup> at *m/z* 5096.6 corresponding to adenylated MccA<sub>2</sub><sup>Hmi</sup>, peptide-adenylate lacking N-terminal methionine (MH<sup>+</sup> at *m/z* 4965.6), full-length MccA<sub>2</sub><sup>Hmi</sup> precursor peptide (MH<sup>+</sup> at *m/z* 4767.6), and MccA<sub>2</sub><sup>Hmi</sup> lacking N-terminal methionine (MH<sup>+</sup> at *m/z* 4636.6) are labeled. MH<sup>+</sup> ions at *m/z* 3637.0 and 4363.5 correspond to *E. coli* proteins. At the bottom spectrum, ions corresponding to adenylated MccA<sub>1</sub><sup>Hmi</sup> (MH<sup>+</sup> at *m/z* 4255.2), peptide-adenylate lacking N-terminal methionine (MH<sup>+</sup> at *m/z* 4124.2), full-length MccA<sub>1</sub><sup>Hmi</sup> precursor peptide (MH<sup>+</sup> at *m/z* 3926.2), and MccA<sub>1</sub><sup>Hmi</sup> lacking N-terminal methionine (MH<sup>+</sup> at *m/z* 3795.2) are labeled.
