# Supplementary material for: Histidine-Triad Hydrolases Provide Resistance to Peptide-Nucleotide Antibiotics
Source: PubMed Central journal article supplement (PMC7157772; doi:10.1128/mbio.00497-20), 2020-04-07
Supplement: mBio.00497-20-sf002.pdf [file mBio.00497-20-sf002.pdf]

SUPPLEMENTARY MATERIALS

**Histidine-Triad Hydrolases Provide Resistance to Peptide-Nucleotide Antibiotics**

Eldar Yagmurov<sup>1</sup>, Darya Tsibulskaya<sup>1,2</sup>, Alexey Livenskiy<sup>2,3</sup> Marina Serebryakova<sup>2,4</sup>, Yury I. Wolf<sup>5</sup>, Sergei Borukhov<sup>6</sup>, Konstantin Severinov<sup>1,7,8\*</sup>, and Svetlana Dubiley<sup>1,2\*</sup>

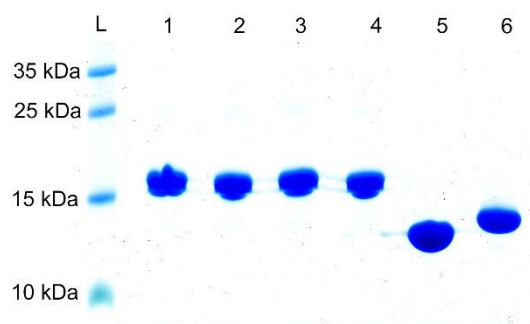

**Figure S2. Coomassie-stained SDS polyacrylamide gel showing purified proteins used in the study.** L – PageRuler Plus Prestained protein ladder; 1 – MccH<sup>Hmi</sup>; 2 – MccH<sup>Hmi</sup> H101N; 3 – MccH<sup>Hmi</sup> K103H; 4 – MccH<sup>Hmi</sup> F44H; 5- HinT<sup>Eco</sup>; 6 - HinT<sup>Hmi</sup>.
