# Supplementary material for: Histidine-Triad Hydrolases Provide Resistance to Peptide-Nucleotide Antibiotics
Source: PubMed Central journal article supplement (PMC7157772; doi:10.1128/mbio.00497-20), 2020-04-07
Supplement: mBio.00497-20-sf003.pdf [file mBio.00497-20-sf003.pdf]

## SUPPLEMENTARY MATERIALS

### Histidine-Triad Hydrolases Provide Resistance to Peptide-Nucleotide Antibiotics

Eldar Yagmurov<sup>1</sup>, Darya Tsibulskaya<sup>1,2</sup>, Alexey Livenskiy<sup>2,3</sup>, Marina Serebryakova<sup>2,4</sup>, Yury I. Wolf<sup>5</sup>, Sergei Borukhov<sup>6</sup>, Konstantin Severinov<sup>1,7,8\*</sup>, and Svetlana Dubiley<sup>1,2\*</sup>

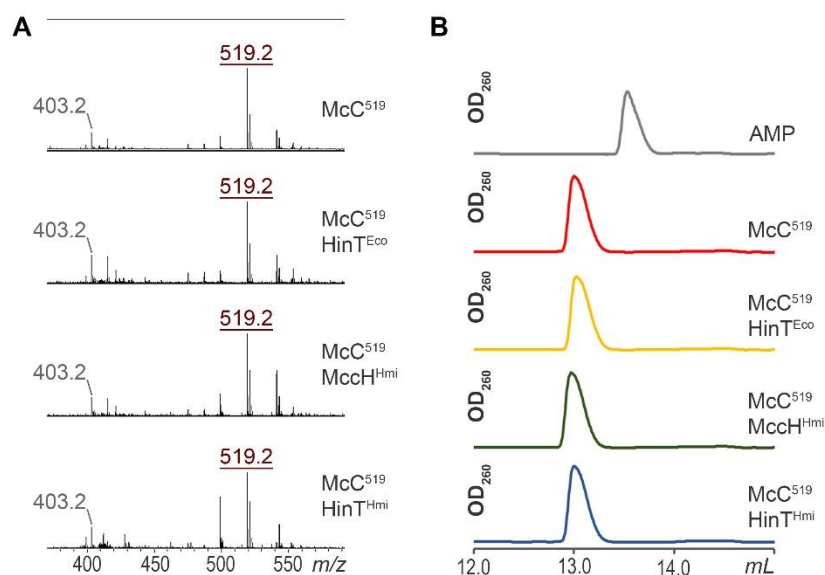

**Figure S3. Aminopropyl decoration of aspartamide-adenylate protects the compound from the phosphoramidase activity of  $MccH^{Hmi}$ ,  $HinT^{Eco}$ , and  $HinT^{Hmi}$ .**

(A) MALDI-TOF-MS spectra of  $McC^{519}$  incubated without the enzyme (top panel) and with  $HinT^{Eco}$ ,  $MccH^{Hmi}$ , and  $HinT^{Hmi}$  (lower panels). The  $MH^+$  ion at  $m/z$  519.2 corresponds to aminopropylated aspartamide-adenylate. No  $MH^+$  ion at  $m/z$  405.2 corresponding to hydrolyzed  $McC^{519}$  is observed.

(B) RP-HPLC elution profile of products of incubation of  $McC^{519}$ , processed aspartamide-adenylate with aminopropyl decoration, without the enzyme and with  $MccH^{Hmi}$ ,  $HinT^{Hmi}$ , and  $HinT^{Eco}$ .
