# Supplementary material for: Histidine-Triad Hydrolases Provide Resistance to Peptide-Nucleotide Antibiotics
Source: PubMed Central journal article supplement (PMC7157772; doi:10.1128/mbio.00497-20), 2020-04-07
Supplement: mBio.00497-20-sf004.pdf [file mBio.00497-20-sf004.pdf]

SUPPLEMENTARY MATERIALS

**Histidine-Triad Hydrolases Provide Resistance to Peptide-Nucleotide Antibiotics**

Eldar Yagmurov<sup>1</sup>, Darya Tsubluskaya<sup>1,2</sup>, Alexey Livenskiy<sup>2,3</sup>, Marina Serebryakova<sup>2,4</sup>, Yury I.

Wolf<sup>5</sup>, Sergei Borukhov<sup>6</sup>, Konstantin Severinov<sup>1,7,8\*</sup>, and Svetlana Dubiley<sup>1,2\*</sup>

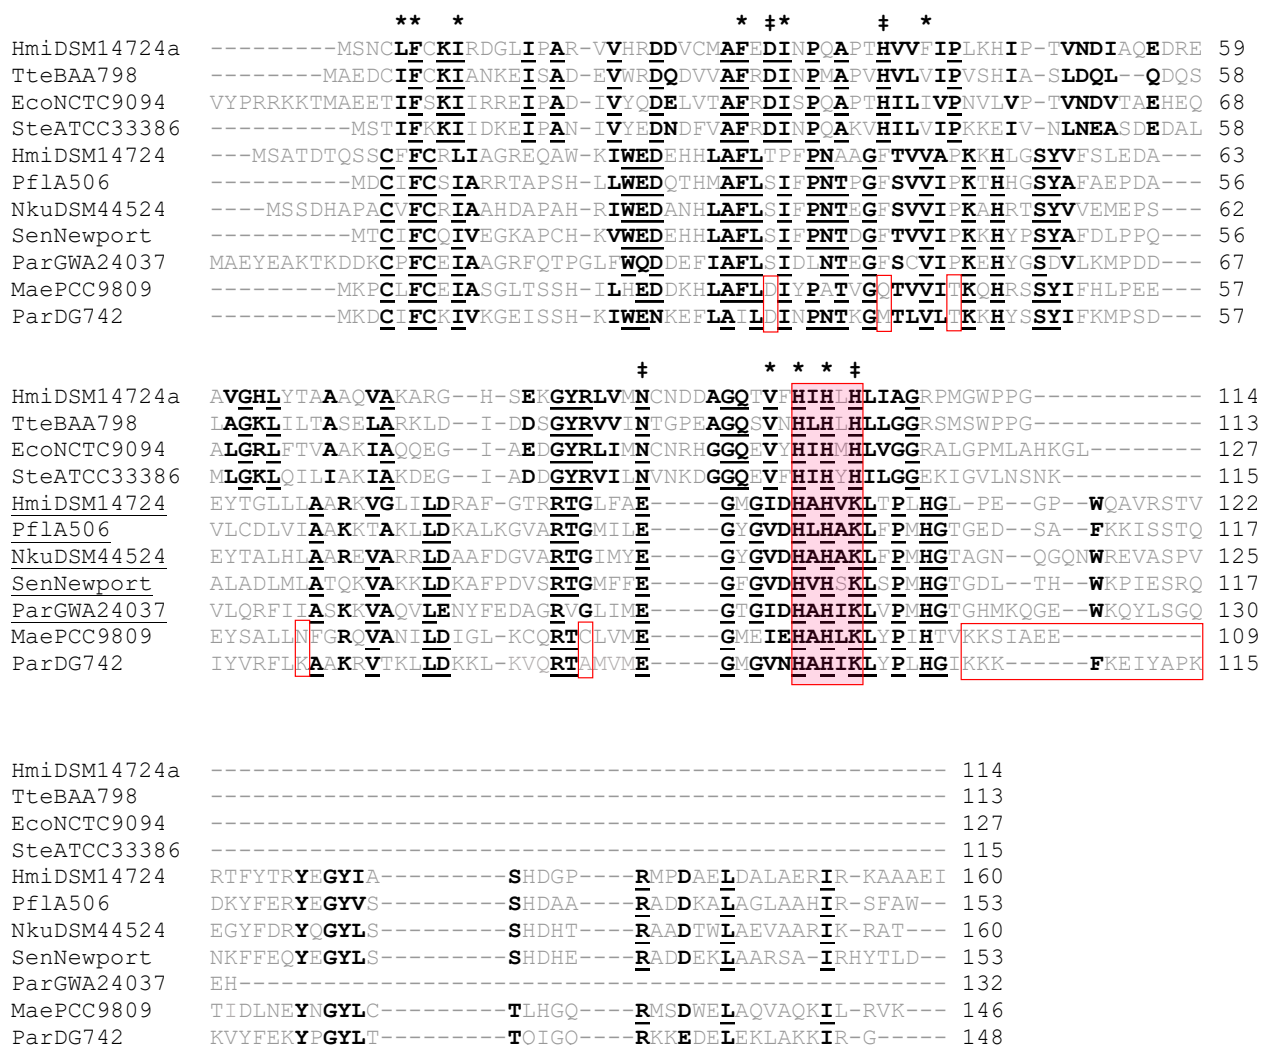

**Figure S4. Conservation of the amino acid sequence in the Protein Kinase C Interacting protein-related clade of HIT proteins.** Sequence alignment of HitT clade of HIT proteins (HmiDSM14724a, WP\_044187632.1 of *Hyalangium minutum* DSM 14724; TteBAA798, ACZ41971.1, of *Thermobaculum terrenum* ATCC BAA-798; EcoNCTC9094, WP\_096759427.1

of *Escherichia coli* NCTC 9094; SteATCC33386, ACZ09064.1 of *Sebaldella termitidis* ATCC 33386) and MccH clade of HIT proteins (HmiDSM14724, WP\_044187428.1 of *Hyalangium minutum* DSM 14724; PflA506, AFJ55311.1 of *Pseudomonas fluorescens* A506; NkuDSM44524, WP\_017574753.1 of *Nocardiopsis kunsanensis* DSM 44524; SenNewport, ECU0367860.1 of *Salmonella enterica* subsp. *enterica* serovar Newport; ParGWA24037, KKR61370.1 of *Parcubacteria bacterium* GW2011\_GWA2\_40\_37; MaePCC9809, CCI22782.1 of *Microcystis aeruginosa* PCC 9809; ParDG742, KPJ57467.1 of *Parcubacteria bacterium* DG\_74\_2). Residues conserved in either of the two groups are shown in bold and underlined. Histidine-triad active site region is indicated by a red-shaded box. Conserved and partially conserved hydrophobic and polar residues forming the nucleotide-binding pocket of HIT proteins are indicated by an asterisk (\*). Substitutions of the active site residues in MccH clade proteins are indicated by (‡). Red boxes mark residues of “inactive” MaePCC9809 and ParDG742 MccH-like proteins, that differ considerably from the MccH consensus.
