# Supplementary material for: Histidine-Triad Hydrolases Provide Resistance to Peptide-Nucleotide Antibiotics
Source: PubMed Central journal article supplement (PMC7157772; doi:10.1128/mbio.00497-20), 2020-04-07
Supplement: mBio.00497-20-sf005.pdf [file mBio.00497-20-sf005.pdf]

SUPPLEMENTARY MATERIALS

**Histidine-Triad Hydrolases Provide Resistance to Peptide-Nucleotide Antibiotics**

Eldar Yagmurov<sup>1</sup>, Darya Tsibulskaya<sup>1,2</sup>, Alexey Livenskiy<sup>2,3</sup>, Marina Serebryakova<sup>2,4</sup>, Yury I. Wolf<sup>5</sup>, Sergei Borukhov<sup>6</sup>, Konstantin Severinov<sup>1,7,8\*</sup>, and Svetlana Dubiley<sup>1,2\*</sup>

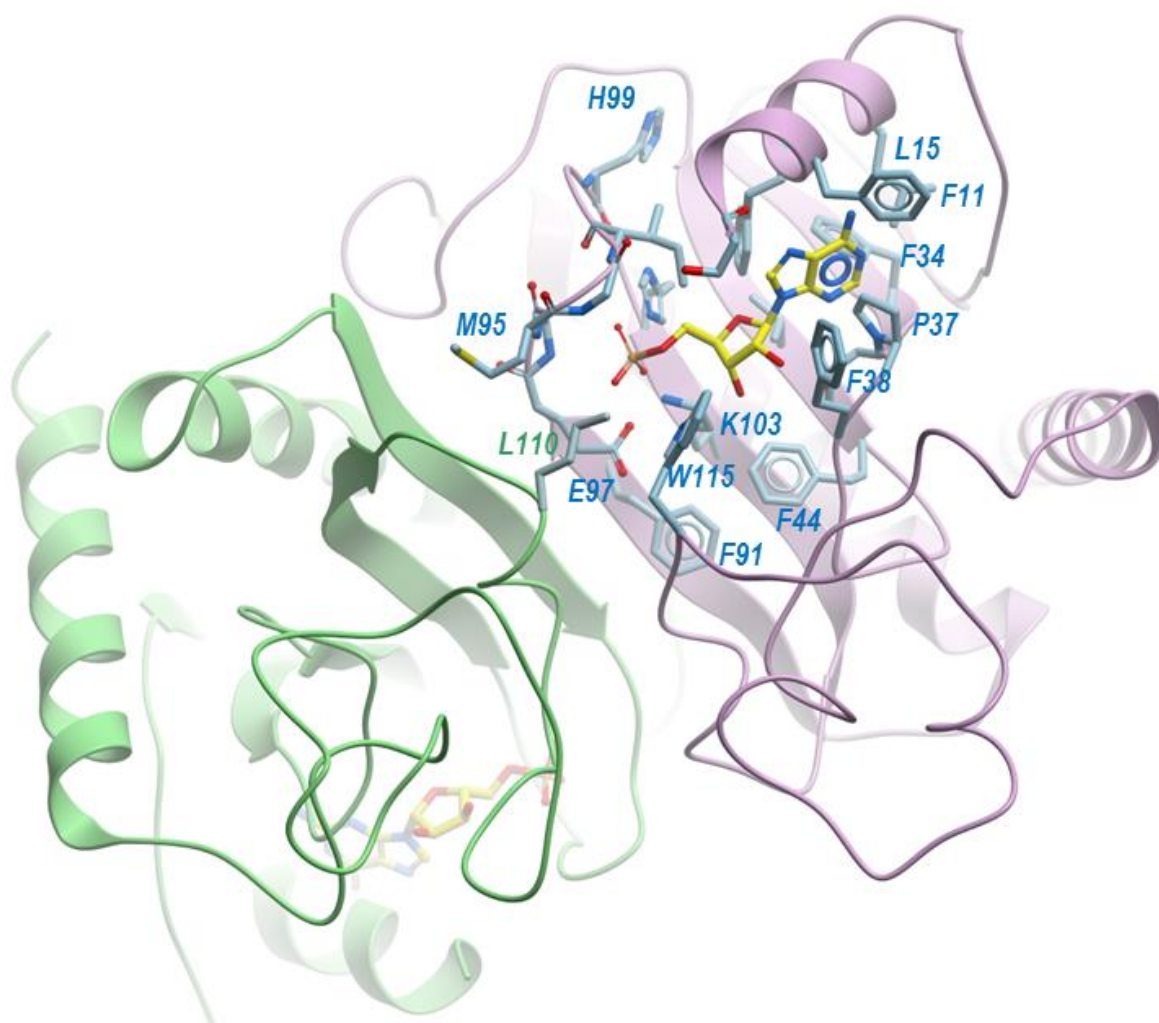

**Figure S5. 3D-structural model of McchHmi dimer in complex with AMP. The two monomers of McchH are depicted as light green and purple colored ribbons diagrams. Residues of the active site that form the substrate-binding pocket are labeled and shown in a stick representation.**
