# Supplementary material for: Histidine-Triad Hydrolases Provide Resistance to Peptide-Nucleotide Antibiotics
Source: PubMed Central journal article supplement (PMC7157772; doi:10.1128/mbio.00497-20), 2020-04-07
Supplement: mBio.00497-20-st001.pdf [file mBio.00497-20-st001.pdf]

SUPPLEMENTARY MATERIALS

**Histidine-Triad Hydrolases Provide Resistance to Peptide-Nucleotide Antibiotics**

Eldar Yagmurov<sup>1</sup>, Darya Tsibulskaya<sup>1,2</sup>, Alexey Livenskiy<sup>2,3</sup> Marina Serebryakova<sup>2,4</sup>, Yury I.

Wolf<sup>5</sup>, Sergei Borukhov<sup>6</sup>, Konstantin Severinov<sup>1,7,8\*</sup>, and Svetlana Dubiley<sup>1,2\*</sup>

**Table S1. Primers used in the study.**

| Primer     | Sequence 5'-3'                                                                                                                                                                | Procedure                  |
|------------|-------------------------------------------------------------------------------------------------------------------------------------------------------------------------------|----------------------------|
| HmiA1_up   | <u>CATGA</u> ACGATAAAGCCACCATCGAAATCAAGA<br>AAGATGAAAAGAAAGCGGAGCCGAAGAAAGT<br>TGTGGTGGTTAAAACCAGCATCAAGGCCGGTC<br>CGGCGGCGTTCAACT <u>A</u>                                   | Cloning into<br>pRSFDuet-1 |
| HmiA1_down | <u>AGCTTAGTTGA</u> ACGCCCGCCGGACCGGCCTTGAT<br>GCTGGTTTTAACCACCACAACCTTCTTCGGCTC<br>CGCTTCTTTTCATCTTTCTTGATTTCGATGGTG<br>GCTTTATCGT <u>T</u>                                   |                            |
| HmiA2_up   | <u>CATGA</u> ACGAGAAAACCGCCCAGGAGAGCCAGA<br>AGACCGAATCGCCGAAAGCCGAAACCCCGGCC<br>AAAAAGGCCGTGATTGTGAAAACCCGCATTAA<br>AGCGGGTCCGGGCGGTGGTGGCCTTGTGCATCC<br>GATCGCCAACT <u>A</u> |                            |
| HmiA2_down | <u>AGCTTAGTTGG</u> CGATCGGATGCACAAGGCCAC<br>CACCGCCCGGACCCGCTTTAATGCGGGTTTTCA<br>CAATCACGGCCTTTTTGGCCGGGGTTTTCGGCTT                                                           |                            |

|                              |                                                                  |                                             |
|------------------------------|------------------------------------------------------------------|---------------------------------------------|
|                              | TCGGCGATT <u>CGGTCTTCTGGCTCTCCTGGGCGG</u><br>TTTTCTCGTT          |                                             |
| HmiB1_F_N<br>deI             | ATTTAT <u>CATATGAAAGACCACCTCTGGC</u>                             |                                             |
| HmiB1_R_<br>KpnI             | TTATAT <u>GGTACCTTATGCCTTGGGGACCTC</u>                           |                                             |
| HmiB2_F_N<br>deI             | TATTAT <u>CATATGAACGACTATCTCTGGC</u>                             |                                             |
| HmiB2_R_<br>KpnI             | TTATAT <u>GGTACCTTAGGGCTGTGGCGTGGAGGG</u>                        |                                             |
| HmiP1P2P3<br>_F_EcoRI        | TTATAT <u>GAATTCCATGGCCATCCCCTTCTCCC</u>                         | Cloning into<br>pACYCduet-1                 |
| HmiP1P2P3<br>_R_KpnI         | TATATT <u>GGTACCTTACGGGTGGGCGATGACG</u>                          |                                             |
| HmiB1_F_B<br>amHI            | ATAATT <u>GGATCCGATGAAAGACCACCTCTGGCT</u><br>GCTGC               | Cloning into<br>pET22_MBP                   |
| HmiB1_R_S<br>all             | ATAATT <u>GTCGACTTATGCCTTGGGGACCTCTTG</u><br>ACGG                |                                             |
| HmiB2_F_B<br>amHI            | ATAATT <u>GGATCCGAACGACTATCTCTGGCTGCT</u><br>CCCC                |                                             |
| HmiB2_R_S<br>all             | ATAATT <u>GTCGACCACTCAGCCGGACCCTGGACT</u><br>CAGG                |                                             |
| pBAD30_Sa<br>IRBS_R_Sal<br>I | TATATT <u>GTCGACTTCCTCCTGTTAGCCCAAAA</u><br>AAACGGGTATGGAGAAACAG | Construction of<br>pBAD30_SalRB<br>S vector |

|                       |                                                       |                                   |
|-----------------------|-------------------------------------------------------|-----------------------------------|
| pBAD30_F_<br>HindIII  | TATTATA <u>AAGCTT</u> GGCTGTTTTGGCGG                  |                                   |
| MccH_F_Sa<br>II       | TTATAG <u>TCGACAT</u> GAGCGCCACCGACACC                | Cloning into<br>pBAD30_SalRB<br>S |
| MccH_R_Hi<br>ndIII    | TTATA <u>AAGCTT</u> TTAAATCTCTGCGGCGGC                |                                   |
| HmiHinT_F<br>_SalI    | ATATA <u>AAGTCGACAT</u> GTCCAAGTGCCTCTTCTG            |                                   |
| HmiHinT_R<br>HindIII  | TTATATA <u>AAGCTT</u> TACCCCGGCGGCCACCCCAT<br>G       |                                   |
| EcoHinT_F_<br>SalI    | ATTATAG <u>TCGACAT</u> GGCAGAAGAACTATATTC<br>AGCAAAAT |                                   |
| EcoHinT_R<br>_HindIII | ATTATA <u>AAGCTT</u> TACAGACCTTTATGCGCCAG<br>CATT     |                                   |
| MccH_F_N<br>deI       | TTATAC <u>ATATGAGCGCCACCGACACC</u>                    | Cloning into<br>pET22(b)          |
| MccH_R_X<br>hoI       | ATTATA <u>CTCGAGAATCTCTGCGGCGGCCTTG</u>               |                                   |
| HmiHinT_F<br>_NdeI    | ATATA <u>ACATATGTCCAAGTGCCTCTTCTG</u>                 |                                   |
| HmiHinT_R<br>XhoI     | ATATAT <u>CTCGAGCCCCGGCGGCCACCCCATG</u>               |                                   |
| EcoHinT_F_<br>NdeI    | ATTATAC <u>ATATGGCAGAAGAACTATATTCAGC</u><br>AAAAT     |                                   |

|                    |                                                                     |             |
|--------------------|---------------------------------------------------------------------|-------------|
| EcoHinT_R<br>_XhoI | ATTATACTCGAGCAGACCTTTATGCGCCAGCAT<br>TGGT                           |             |
| MccH_F44<br>H_F    | CCCAACGCGGCCG <b><u>CCAC</u></b> ACCGTGGTGGCGCC<br>CAAG             | Mutagenesis |
| MccH_F44<br>H_R    | GCCACCACGGT <b><u>GTG</u></b> GCCGCGCGTTGGGGAA<br>CGGCG             |             |
| MccH_H99<br>N_F    | GAGGGCATGGGCATTGATA <b><u>AAC</u></b> GCCCACGTGAA<br>GCTCACGCCGCTGC |             |
| MccH_H99<br>N_R    | GAGCTTCACGTGGG <b><u>GTT</u></b> TATCAATGCCCATGCC<br>CTCGGCGAACAG   |             |
| MccH_H101<br>N_F   | CATGGGCATTGATCACGCC <b><u>AAC</u></b> GTGAAGCTCA<br>CGCCGCTGCACGG   |             |
| MccH_H101<br>N_R   | GCGGCGTGAGCTTCAC <b><u>GTT</u></b> GGCGTGATCAATG<br>CCCATGCCCTCGG   |             |
| MccH_K103<br>H_F   | ATTGATCACGCC <b><u>CAC</u></b> GTGCACCTCACGCCGCTG<br>CACGGCCTCCCC   |             |
| MccH_K103<br>H_R   | GCAGCGGCGTGAG <b><u>GTG</u></b> CACGTGGGCGTGATCA<br>ATGCCCATGCC     |             |

Sequences of restriction endonucleases recognition sites are shown in plain typeface and are underlined; Sequences corresponding to ribosomal binding sites are highlighted in bold; Codons corresponding to mutated amino acids are underlined and highlighted in bold.
